# Supplementary material for: Associations between welding fume exposure and neurological function in Japanese male welders and non‐welders
Source: PubMed Central journal article supplement — J Occup Health. 2023 Feb 23;65(1):e12393. doi: 10.1002/1348-9585.12393 (PMC9950351; doi:10.1002/1348-9585.12393), 2023-02-23
Supplement: JOH2-65-e12393-s001.pdf [file JOH2-65-e12393-s001.pdf]

**Supplemental Table 1. Results of the multivariable analysis for the relationships between WMI and Urine Cr concentrations**

| Urine Cr<br>(µg/dL) | All    |        |                  |          | Non-welders |        |                  |          | Welders |        |                  |          |
|---------------------|--------|--------|------------------|----------|-------------|--------|------------------|----------|---------|--------|------------------|----------|
|                     | ≥mean† | <mean† | OR (95% CI)      | P value* | ≥mean†      | <mean† | OR (95% CI)      | P value* | ≥mean†  | <mean† | OR (95% CI)      | P value* |
| <b>WMI</b>          |        |        |                  |          |             |        |                  |          |         |        |                  |          |
| T1 (UDL-0.3)        | 20     | 21     | 1.00 (referent)  |          | 14          | 12     | 1.00 (referent)  |          | 6       | 9      | 1.00 (referent)  |          |
| T2 (0.4)            | 26     | 20     | 0.73 (0.30-1.80) | 0.497    | 22          | 14     | 0.63 (0.21-1.91) | 0.420    | 4       | 6      | 1.03 (0.18-5.81) | 0.974    |
| T3 (0.5-2.7)        | 40     | 60     | 1.12 (0.51-2.46) | 0.773    | 17          | 16     | 0.97 (0.33-2.89) | 0.963    | 23      | 44     | 1.36 (0.39-4.67) | 0.631    |
|                     |        |        | P for trend      | 0.546    |             |        | P for trend      | 0.634    |         |        | P for trend      | 0.848    |

† Mean of WMI is 92.9.

\* P values were obtained using multivariable logistic regression analysis adjusted for age, body mass index, smoking habits, drinking habits, factory and welding exposure-years. Abbreviations: OR, odds ratio; CI, confidence interval; T, tertile; UDL, under detection limit; Cr, chromium

**Supplemental Table 2. Results of the multivariable analysis for the relationships between WMI and Blood Pb concentrations**

| Blood Pb<br>(µg/dL) | All    |        |                  |          | Non-welders |        |                  |          | Welders |        |                  |          |
|---------------------|--------|--------|------------------|----------|-------------|--------|------------------|----------|---------|--------|------------------|----------|
|                     | ≥mean† | <mean† | OR (95% CI)      | P value* | ≥mean†      | <mean† | OR (95% CI)      | P value* | ≥mean†  | <mean† | OR (95% CI)      | P value* |
| <b>WMI</b>          |        |        |                  |          |             |        |                  |          |         |        |                  |          |
| T1 (UDL-1.1)        | 24     | 30     | 1.00 (referent)  |          | 17          | 18     | 1.00 (referent)  |          | 7       | 12     | 1.00 (referent)  |          |
| T2 (1.2-1.7)        | 37     | 31     | 0.48 (0.21-1.10) | 0.084    | 23          | 12     | 0.41 (0.14-1.19) | 0.101    | 14      | 19     | 0.55 (0.14-2.16) | 0.393    |
| T3 (1.8-3.7)        | 25     | 40     | 0.80 (0.34-1.90) | 0.610    | 13          | 12     | 0.64 (0.19-2.15) | 0.475    | 12      | 28     | 0.86 (0.22-3.44) | 0.832    |
|                     |        |        | P for trend      | 0.165    |             |        | P for trend      | 0.245    |         |        | P for trend      | 0.571    |

† Mean of WMI is 92.9.

\* P values were obtained using multivariable logistic regression analysis adjusted for age, body mass index, smoking habits, drinking habits, factory and welding exposure-years. Abbreviations: OR, odds ratio; CI, confidence interval; T, tertile; UDL, under detection limit; Pb, lead
